# Supplementary material
Source: publisher figshare collection journal article supplement (https://aacr.figshare.com/articles/dataset/_/22469900)

**Figure S6**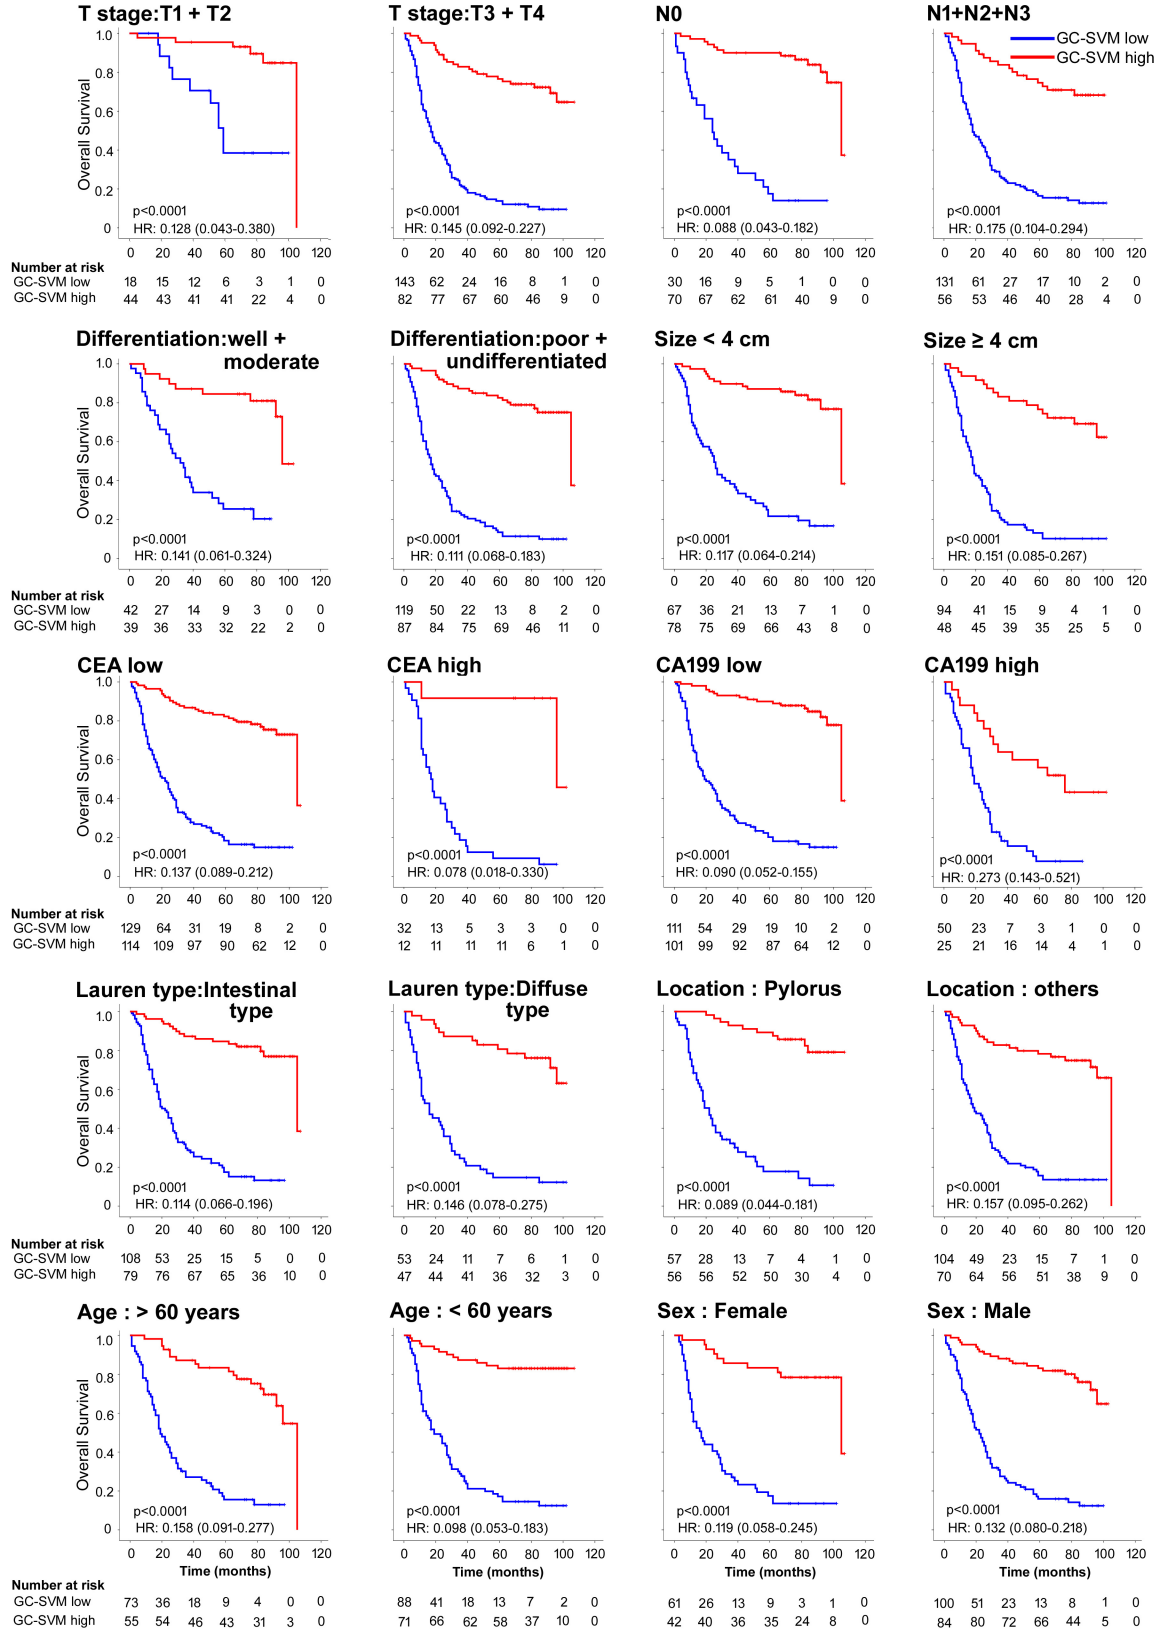

Supplement: Supplementary file 1 [file 39921386]
